# Supplementary material for: Voters and Health Reform in the 2008 Presidential Election
Source: Atypon-hosted journal article supplement (doi:10.1056/nejmsr0807717), 2008-10-31
Supplement: nejm_blendon_2050sa1.pdf [file nejm_blendon_2050sa1.pdf]

## Supplementary Appendix

This appendix has been provided by the authors to give readers additional information about their work.

Supplement to: Blendon RJ, Altman DE, Benson JM, et al. Voters and health reform in the 2008 presidential election. *N Engl J Med* 2008;359:2050-61. DOI: 10.1056/NEJMSr0807717.

## Appendix

### VOTERS AND HEALTH REFORM IN THE 2008 PRESIDENTIAL ELECTION Blendon et al.

#### Survey questions

In order to assess the general public's views about health care in the months preceding the November 2008 presidential election, we examined responses to a variety of survey items, including assessments of the nation's health care system,<sup>1,2</sup> views about President George W. Bush's handling of health care policy,<sup>3</sup> views about the medical care Iraqi War veterans receive when they return to U.S.,<sup>4</sup> serious problems people have experienced due to recent changes in the economy, and worries about losing health insurance.<sup>5</sup> The array of questions and their responses are laid out in Table 1.

In the exit polls, in order to identify the issues that voters thought were most important in their presidential vote choice, voters were given a list of the campaign issues that had been widely covered in the media. In 1992 and 2004, respondents could give only a single response. In 1988, 1996, and 2000, respondents could give up to 2 responses.<sup>6-10</sup>

In the 2008 survey conducted by the Kaiser Family Foundation and the Harvard School of Public Health, registered voters (self-described) were asked the following: which 1 from a list of 6 issues mentioned in the media as important national problems was most important in their vote choice; whether candidate characteristics or issues were more important in their vote choice; which 1 from a list of 5 health care issues raised by the presidential candidates and the media during the campaign would be most important in their vote choice; which of 4 statements described their view of the state of the nation's health care system; whom they thought should be most responsible for helping ensure that Americans receive health insurance coverage; which type of national plan, if any, to expand health insurance coverage they would want the next president to propose; how much they thought the president and Congress can do about health care costs; whom from a list of 5 options they thought should be most responsible for slowing rising health care costs; which of 4 possible ways to reducing rising health care costs they thought should be the next president's highest priority; their assessment, favorable or unfavorable, of possible elements in the health care debate; when considering a health care proposal, how important a consideration is that it not raise taxes; after being told that the country had a substantial deficit and there were many important other priorities for the next Administration, their views on whether the next president should propose increasing, decreasing or keeping the same level of spending in 6 different areas of health care; and their views about abortion. In order to compare the views of those who intended to vote for Senator McCain and Senator Obama, the survey asked registered voters their voting intention and (for those who did not initially choose a candidate) which candidate they leaned toward.<sup>11</sup>

## References

1. Harvard School of Public Health/Robert Wood Johnson Foundation poll. Storrs, CT: Roper Center for Public Opinion Research, March 26, 2008.
2. Harvard School of Public Health/Harris Interactive poll. Most Republicans think the U.S. health care system is the best in the world; Democrats disagree. Boston: Harvard School of Public Health, March 20, 2008. (Accessed October 17, 2008, at <http://www.hsph.harvard.edu/news/pressreleases/2008-releases/republicans-democrats-disagree-us-health-care-system.html>.)
3. Gallup Poll. Storrs, Conn.: Roper Center for Public Opinion Research, February 11, 2008.
4. Harvard School of Public Health/Harris Interactive. Americans believe wounded Iraq war veterans are not receiving high quality medical care when they return to the U.S. Boston: Harvard School of Public Health, May 25, 2008. (Accessed October 17, 2008, at <http://www.hsph.harvard.edu/news/pressreleases/2008-releases/iraq-veterans-care-poll.html>.)
5. Kaiser health tracking poll: election 2008. Menlo Park, CA: Kaiser Family Foundation, October 2008 [survey conducted in September]. (Accessed October 17, 2008, at <http://www.kff.org/kaiserpolls/upload/7816-2.pdf>.)
6. ABC News. National election day exit poll. Storrs, Conn.: Roper Center for Public Opinion Research, November 8, 1988.
7. Voter Research and Surveys. National election day exit poll. Storrs, Conn.: Roper Center for Public Opinion Research, November 3, 1992.
8. Los Angeles Times. National election day exit poll. Storrs, Conn.: Roper Center for Public Opinion Research, November 5, 1996.
9. Los Angeles Times. National election day exit poll. Storrs, Conn.: Roper Center for Public Opinion Research, November 7, 2000.
10. National Election Pool/Edison Media Research/Mitofsky International. National election day exit poll. Storrs, Conn.: Roper Center for Public Opinion Research, November 2, 2004.
11. Kaiser Family Foundation/Harvard School of Public Health poll. Storrs, Conn.: Roper Center for Public Opinion Research, September 2008.

Survey questionnaire and results (appended starting on the next page)

**Kaiser Family Foundation  
Harvard School of Public Health  
Pre-Election Poll**

The study was conducted for KFF/HSPH via telephone by ICR, an independent research company. Interviews were conducted from September 10 – September 21, 2008 among a nationally representative sample of 1,622 registered voters age 18 or older. A total of 680 were McCain voters – registered voters who said that if the presidential election were being held today, they would vote for or lean toward voting for McCain-Palin. A total of 765 were Obama voters – registered voters who said that if the presidential election were being held today, they would vote for or lean toward voting for Obama-Biden. The margin of error for total respondents is +/- 2.7 at the 95% confidence level. The margin of error for McCain voters is +/- 4.2 at the 95% confidence level and +/- 4.1 at the 95% confidence level for Obama voters.

D01. RESPONDENT GENDER

| <b>Total<br/>registered<br/>voters</b> | <b>McCain<br/>voters</b> | <b>Obama<br/>voters</b> |        |
|----------------------------------------|--------------------------|-------------------------|--------|
| <b>48</b>                              | <b>54</b>                | <b>44</b>               | Male   |
| <b>52</b>                              | <b>46</b>                | <b>56</b>               | Female |

S1. Some people are registered to vote and others are not. Are you currently registered to vote at your present address, or not?

| <b>Total<br/>registered<br/>voters</b> | <b>McCain<br/>voters</b> | <b>Obama<br/>voters</b> |                            |
|----------------------------------------|--------------------------|-------------------------|----------------------------|
| <b>100</b>                             | <b>100</b>               | <b>100</b>              | Yes, registered to vote    |
| --                                     | --                       | --                      | No, not registered to vote |
| --                                     | --                       | --                      | Don't know                 |
| --                                     | --                       | --                      | Refused                    |

(ROTATE CANDIDATES IN PARENS)

1. If the 2008 presidential election were being held today, would you vote for (John McCain and Sarah Palin [PAY-lin] the Republican candidates) or (Barack Obama and Joe Biden [BUY-din], the Democratic candidates)?

(ROTATE CANDIDATES IN SAME ORDER AS Q1)

- 1a. Which candidates are you leaning toward (John McCain and Sarah Palin [PAY-lin] the Republican candidates) or (Barack Obama and Joe Biden [BUY-din], the Democratic candidates)?

1/1a. Combo Table based on total registered voters

| <b>Total<br/>registered<br/>voters</b> | <b>McCain<br/>voters</b> | <b>Obama<br/>voters</b> |                                                        |
|----------------------------------------|--------------------------|-------------------------|--------------------------------------------------------|
| <b>42</b>                              | <b>100</b>               | --                      | Would vote for/lean toward John McCain and Sarah Palin |
| <b>47</b>                              | --                       | <b>100</b>              | Would vote for/lean toward Barack Obama and Joe Biden  |
| *                                      | --                       | --                      | (vol.) Would vote for other candidate                  |
| *                                      | --                       | --                      | (vol.) Would not vote                                  |
| <b>10</b>                              | --                       | --                      | Undecided/dk/refuse                                    |

(ROTATE VERBIAGE IN PARENS)

2. Overall, which of the following will be MOST important when you decide who to vote for? Will it be (the candidates' stands on the issues) or (your perception of the candidates' leadership abilities, character, values, and experience)?

| <b>Total<br/>registered<br/>voters</b> | <b>McCain<br/>voters</b> | <b>Obama<br/>voters</b> |                                                                                        |
|----------------------------------------|--------------------------|-------------------------|----------------------------------------------------------------------------------------|
| <b>53</b>                              | <b>39</b>                | <b>67</b>               | The candidates' stands on the issues                                                   |
| <b>41</b>                              | <b>57</b>                | <b>29</b>               | Perceptions of the candidates' leadership abilities, character, values, and experience |
| <b>4</b>                               | <b>3</b>                 | <b>4</b>                | Don't know                                                                             |
| <b>1</b>                               | <b>1</b>                 | <b>1</b>                | Refused                                                                                |

(SCRAMBLE 1-6)

3. Thinking ahead to the November 2008 election, which of the following issues will be most important to you when you decide how to vote for president?

| <b>Total<br/>registered<br/>voters</b> | <b>McCain<br/>voters</b> | <b>Obama<br/>voters</b> |                              |
|----------------------------------------|--------------------------|-------------------------|------------------------------|
| <b>48</b>                              | <b>40</b>                | <b>56</b>               | The economy                  |
| <b>11</b>                              | <b>9</b>                 | <b>13</b>               | The war in Iraq              |
| <b>12</b>                              | <b>9</b>                 | <b>14</b>               | Health care                  |
| <b>4</b>                               | <b>6</b>                 | <b>3</b>                | Illegal immigration          |
| <b>8</b>                               | <b>17</b>                | <b>1</b>                | Terrorism                    |
| <b>13</b>                              | <b>15</b>                | <b>10</b>               | Energy, including gas prices |
| <b>1</b>                               | <b>1</b>                 | <b>1</b>                | (vol.) Other                 |
| <b>1</b>                               | <b>1</b>                 | <b>1</b>                | (vol.) None of these         |
| <b>1</b>                               | <b>2</b>                 | <b>1</b>                | Don't know                   |
| <b>1</b>                               | <b>1</b>                 | <b>*</b>                | Refused                      |

(SCRAMBLE 1-6; CODES 4 AND 6 SHOULD ALWAYS BE KEPT SEPARATE)

5. Now thinking specifically about HEALTH CARE, which ONE of the following health care issues would you most like to see the next president take action on?

| <b>Total<br/>registered<br/>voters</b> | <b>McCain<br/>voters</b> | <b>Obama<br/>voters</b> |                                                                            |
|----------------------------------------|--------------------------|-------------------------|----------------------------------------------------------------------------|
| <b>45</b>                              | <b>44</b>                | <b>46</b>               | Making health care and health insurance more affordable                    |
| <b>22</b>                              | <b>10</b>                | <b>33</b>               | Expanding health insurance coverage for the uninsured                      |
| <b>11</b>                              | <b>15</b>                | <b>8</b>                | Improving the quality of care and reducing medical errors                  |
| <b>7</b>                               | <b>13</b>                | <b>2</b>                | Reducing spending on government health programs like Medicare and Medicaid |
| <b>11</b>                              | <b>14</b>                | <b>9</b>                | Improving Medicare and the Medicare prescription drug program              |
| <b>1</b>                               | <b>1</b>                 | <b>1</b>                | (vol.) Other                                                               |
| <b>1</b>                               | <b>2</b>                 | <b>*</b>                | (vol.) None of these                                                       |
| <b>1</b>                               | <b>1</b>                 | <b>1</b>                | Don't know                                                                 |
| <b>*</b>                               | <b>*</b>                 | <b>*</b>                | Refused                                                                    |

(ROTATE 1-4/4-1)

6. Which one of the following comes closest to your view about the health care system in America today?

| Total registered voters | McCain voters | Obama voters |                                                                                              |
|-------------------------|---------------|--------------|----------------------------------------------------------------------------------------------|
| 24                      | 16            | 28           | There is so much wrong with our health care system that it needs to be completely overhauled |
| 46                      | 40            | 55           | There are some good things about our health care system, but major changes are needed        |
| 26                      | 39            | 15           | The health care system works pretty well, but minor changes are needed                       |
| 3                       | 4             | 1            | The health care system works well and does not need to be changed                            |
| 1                       | 1             | 1            | Don't know                                                                                   |
| *                       | *             | --           | Refused                                                                                      |

(SCRAMBLE 1-3)

7. Which one of the following do you think should have the most responsibility for helping ensure that Americans receive health insurance coverage?

| Total registered voters | McCain voters | Obama voters |                          |
|-------------------------|---------------|--------------|--------------------------|
| 38                      | 20            | 54           | The federal government   |
| 25                      | 30            | 23           | Employers and businesses |
| 31                      | 47            | 18           | Individuals themselves   |
| 2                       | 1             | 3            | (vol.) All of these      |
| *                       | *             | *            | (vol.) None of these     |
| 2                       | 1             | 2            | Don't know               |
| *                       | *             | *            | Refused                  |

8. When it comes to health insurance coverage, which of the following would you like the next president to propose:

| Total registered voters | McCain voters | Obama voters |                                                                                                                                                                          |
|-------------------------|---------------|--------------|--------------------------------------------------------------------------------------------------------------------------------------------------------------------------|
| 47                      | 26            | 65           | A new health plan that would make a major effort to provide health insurance for all or nearly all of the uninsured BUT would involve a substantial increase in spending |
| 30                      | 36            | 26           | A new health plan that is more limited and would cover only some of the uninsured BUT would involve less new spending                                                    |
| 17                      | 31            | 5            | Keeping things basically as they are                                                                                                                                     |
| 5                       | 6             | 4            | Don't know                                                                                                                                                               |
| 1                       | 1             | *            | Refused                                                                                                                                                                  |

(SCRAMBLE 1-4)

9. Which of the following should be the next president's top priority when it comes to addressing rising health care costs?

| Total registered voters | McCain voters | Obama voters |                                                                                             |
|-------------------------|---------------|--------------|---------------------------------------------------------------------------------------------|
| 50                      | 44            | 57           | Reducing the amount people pay for their health care and health insurance                   |
| 22                      | 24            | 21           | Reducing what the nation as a whole spends on health care                                   |
| 9                       | 12            | 6            | Reducing future spending on government health insurance programs like Medicare and Medicaid |
| 10                      | 11            | 9            | Reducing the amount employers pay to provide health insurance to their workers              |
| *                       | *             | *            | (vol.) All of these                                                                         |
| 4                       | 4             | 3            | (vol.) None of these                                                                        |
| 4                       | 4             | 3            | Don't know                                                                                  |
| 1                       | *             | *            | Refused                                                                                     |

(SCRAMBLE 1-5)

10. Which one of the following do you think should have the most responsibility for slowing the rise in health care costs?

| Total registered voters | McCain voters | Obama voters |                            |
|-------------------------|---------------|--------------|----------------------------|
| 23                      | 15            | 30           | The federal government     |
| 4                       | 5             | 4            | Employers and businesses   |
| 33                      | 31            | 36           | Health insurance companies |
| 24                      | 27            | 20           | Doctors and hospitals      |
| 11                      | 16            | 6            | Individuals themselves     |
| 2                       | 1             | 3            | (vol.) All of these        |
| 1                       | 2             | *            | (vol.) None of these       |
| 2                       | 3             | 1            | Don't know                 |
| *                       | 1             | *            | Refused                    |

11. Do you think that the cost of health care is something the president and Congress can do a lot about, do a little about, or is that mostly beyond their control?

| Total registered voters | McCain voters | Obama voters |                             |
|-------------------------|---------------|--------------|-----------------------------|
| 58                      | 41            | 73           | A lot                       |
| 25                      | 34            | 19           | A little                    |
| 15                      | 22            | 7            | Mostly beyond their control |
| 2                       | 2             | 1            | Don't know                  |
| *                       | 1             | *            | Refused                     |

(ROTATE VERBIAGE IN PARENS)

12. Do you think the federal government should become (more) directly involved in trying to control health care costs, (less) directly involved, or should their involvement stay about the same?

| Total registered voters | McCain voters | Obama voters |                     |
|-------------------------|---------------|--------------|---------------------|
| 66                      | 46            | 85           | More                |
| 15                      | 27            | 5            | Less                |
| 16                      | 23            | 9            | Stay about the same |
| 2                       | 3             | 2            | Don't know          |
| *                       | 1             | *            | Refused             |

(ASK ITEMS a, b, c, and e OF ONE-HALF OF RESPONDENTS; ASK ITEMS d, f, AND g OF OTHER HALF OF RESPONDENTS  
(SCRAMBLE ITEMS a-g)

13. Following are some elements that are being discussed as the presidential candidates debate over health care. For each, please tell me if you find this element favorable or unfavorable. How about (INSERT ITEM)? Do you find this favorable or unfavorable? (GET ANSWER THEN ASK: Is that somewhat or very [FAVORABLE/UNFAVORABLE])?

| Total registered voters                                                                                                                                                         | Very favorable | Somewhat favorable | Somewhat unfavorable | Very unfavorable | Don't know | Refused |
|---------------------------------------------------------------------------------------------------------------------------------------------------------------------------------|----------------|--------------------|----------------------|------------------|------------|---------|
| a. Financial assistance from the government to help low and middle-income people purchase insurance                                                                             | 44             | 31                 | 12                   | 11               | 2          | *       |
| b. Requiring health insurance companies to cover anyone who applies, even if they have a prior illness                                                                          | 56             | 27                 | 10                   | 6                | 1          | *       |
| c. Requiring employers to either offer health insurance to their workers or pay money into a government pool that provides coverage for those who aren't covered                | 39             | 32                 | 11                   | 15               | 3          | *       |
| d. Requiring parents whose children are not currently covered to buy health insurance for their children, with financial help from the government for those who can't afford it | 42             | 35                 | 9                    | 12               | 2          | *       |
| e. Changing the tax system so that everyone who buys health insurance would get the same tax break whether they get coverage at work or on their own                            | 48             | 32                 | 10                   | 6                | 3          | *       |
| f. Expanding high risk insurance pools to cover people who have an illness that makes it hard to buy insurance in the regular market                                            | 45             | 31                 | 10                   | 10               | 3          | *       |
| g. Using tax incentives to encourage more people to sign up for health savings accounts                                                                                         | 34             | 37                 | 11                   | 14               | 4          | *       |

| <b>McCain voters</b>                                                                                                                                                            | Very favorable | Somewhat favorable | Somewhat unfavorable | Very unfavorable | Don't know | Refused   |
|---------------------------------------------------------------------------------------------------------------------------------------------------------------------------------|----------------|--------------------|----------------------|------------------|------------|-----------|
| a. Financial assistance from the government to help low and middle-income people purchase insurance                                                                             | <b>28</b>      | <b>34</b>          | <b>16</b>            | <b>19</b>        | <b>2</b>   | <b>*</b>  |
| b. Requiring health insurance companies to cover anyone who applies, even if they have a prior illness                                                                          | <b>46</b>      | <b>30</b>          | <b>14</b>            | <b>8</b>         | <b>2</b>   | <b>*</b>  |
| c. Requiring employers to either offer health insurance to their workers or pay money into a government pool that provides coverage for those who aren't covered                | <b>26</b>      | <b>31</b>          | <b>17</b>            | <b>21</b>        | <b>4</b>   | <b>--</b> |
| d. Requiring parents whose children are not currently covered to buy health insurance for their children, with financial help from the government for those who can't afford it | <b>29</b>      | <b>37</b>          | <b>13</b>            | <b>18</b>        | <b>2</b>   | <b>*</b>  |
| e. Changing the tax system so that everyone who buys health insurance would get the same tax break whether they get coverage at work or on their own                            | <b>49</b>      | <b>33</b>          | <b>7</b>             | <b>7</b>         | <b>3</b>   | <b>--</b> |
| f. Expanding high risk insurance pools to cover people who have an illness that makes it hard to buy insurance in the regular market                                            | <b>36</b>      | <b>39</b>          | <b>11</b>            | <b>11</b>        | <b>3</b>   | <b>*</b>  |
| g. Using tax incentives to encourage more people to sign up for health savings accounts                                                                                         | <b>38</b>      | <b>37</b>          | <b>9</b>             | <b>12</b>        | <b>4</b>   | <b>*</b>  |

| <b>Obama voters</b>                                                                                                                                                             | Very favorable | Somewhat favorable | Somewhat unfavorable | Very unfavorable | Don't know | Refused   |
|---------------------------------------------------------------------------------------------------------------------------------------------------------------------------------|----------------|--------------------|----------------------|------------------|------------|-----------|
| a. Financial assistance from the government to help low and middle-income people purchase insurance                                                                             | <b>57</b>      | <b>31</b>          | <b>8</b>             | <b>4</b>         | <b>1</b>   | <b>--</b> |
| b. Requiring health insurance companies to cover anyone who applies, even if they have a prior illness                                                                          | <b>64</b>      | <b>26</b>          | <b>6</b>             | <b>3</b>         | <b>1</b>   | <b>1</b>  |
| c. Requiring employers to either offer health insurance to their workers or pay money into a government pool that provides coverage for those who aren't covered                | <b>50</b>      | <b>32</b>          | <b>7</b>             | <b>8</b>         | <b>3</b>   | <b>*</b>  |
| d. Requiring parents whose children are not currently covered to buy health insurance for their children, with financial help from the government for those who can't afford it | <b>54</b>      | <b>33</b>          | <b>5</b>             | <b>7</b>         | <b>*</b>   | <b>1</b>  |
| e. Changing the tax system so that everyone who buys health insurance would get the same tax break whether they get coverage at work or on their own                            | <b>48</b>      | <b>32</b>          | <b>12</b>            | <b>6</b>         | <b>3</b>   | <b>--</b> |
| f. Expanding high risk insurance pools to cover people who have an illness that makes it hard to buy insurance in the regular market                                            | <b>57</b>      | <b>24</b>          | <b>9</b>             | <b>8</b>         | <b>2</b>   | <b>--</b> |
| g. Using tax incentives to encourage more people to sign up for health savings accounts                                                                                         | <b>31</b>      | <b>37</b>          | <b>13</b>            | <b>15</b>        | <b>3</b>   | <b>--</b> |

- 13a. When considering health care proposals, how important is it to you that the proposal NOT raise taxes: Is that...?

| <b>Total registered voters</b> | <b>McCain voters</b> | <b>Obama voters</b> |                                          |
|--------------------------------|----------------------|---------------------|------------------------------------------|
| 17                             | 23                   | 12                  | The most important consideration for you |
| 40                             | 47                   | 33                  | A very important consideration for you   |
| 35                             | 26                   | 42                  | Somewhat important                       |
| 8                              | 3                    | 13                  | Not important at all                     |
| 1                              | 1                    | *                   | Don't know                               |
| *                              | *                    | *                   | Refused                                  |

14. Do you favor or oppose changing federal law to allow Americans to buy prescription drugs imported from Canada?

| <b>Total registered voters</b> | <b>McCain voters</b> | <b>Obama voters</b> |            |
|--------------------------------|----------------------|---------------------|------------|
| 68                             | 66                   | 71                  | Favor      |
| 26                             | 29                   | 24                  | Oppose     |
| 5                              | 5                    | 5                   | Don't know |
| 1                              | *                    | 1                   | Refused    |

15. Do you favor or oppose changing the law to allow the federal government to use its buying power to negotiate with drug companies to try to get a lower price for prescription drugs for people on Medicare?

| <b>Total registered voters</b> | <b>McCain voters</b> | <b>Obama voters</b> |            |
|--------------------------------|----------------------|---------------------|------------|
| 89                             | 85                   | 92                  | Favor      |
| 10                             | 14                   | 7                   | Oppose     |
| 1                              | 1                    | 1                   | Don't know |
| *                              | --                   | *                   | Refused    |

(SCRAMBLE ITEMS a-f)

16. As you know, the federal government has a substantial budget deficit and there are many competing spending priorities facing the next president. Thinking about the federal budget, do you want to see the next president increase spending on (INSERT 1ST ITEM), decrease spending, or keep it about the same? How about (INSERT NEXT ITEM)?

| <b>Total registered voters</b>                    | <b>Increase spending</b> | <b>Decrease spending</b> | <b>Keep it about the same</b> | <b>Don't know</b> | <b>Refused</b> |
|---------------------------------------------------|--------------------------|--------------------------|-------------------------------|-------------------|----------------|
| a. Medicare                                       | 41                       | 8                        | 48                            | 3                 | --             |
| b. Medicaid                                       | 33                       | 12                       | 51                            | 4                 | *              |
| c. Biomedical research                            | 34                       | 11                       | 48                            | 7                 | *              |
| d. Programs to prevent disease and improve health | 53                       | 5                        | 39                            | 2                 | *              |
| e. Medical care for veterans                      | 72                       | 2                        | 24                            | 2                 | *              |
| f. Programs to protect against bioterrorism       | 38                       | 11                       | 47                            | 4                 | *              |

| <b>McCain voters</b>                              | Increase spending | Decrease spending | Keep it about the same | Don't know | Refused  |
|---------------------------------------------------|-------------------|-------------------|------------------------|------------|----------|
| a. Medicare                                       | <b>31</b>         | <b>11</b>         | <b>54</b>              | <b>3</b>   | --       |
| b. Medicaid                                       | <b>22</b>         | <b>18</b>         | <b>56</b>              | <b>4</b>   | *        |
| c. Biomedical research                            | <b>24</b>         | <b>15</b>         | <b>54</b>              | <b>6</b>   | <b>1</b> |
| d. Programs to prevent disease and improve health | <b>39</b>         | <b>7</b>          | <b>52</b>              | <b>2</b>   | --       |
| e. Medical care for veterans                      | <b>70</b>         | <b>2</b>          | <b>26</b>              | <b>2</b>   | *        |
| f. Programs to protect against bioterrorism       | <b>41</b>         | <b>6</b>          | <b>49</b>              | <b>3</b>   | *        |

| <b>Obama voters</b>                               | Increase spending | Decrease spending | Keep it about the same | Don't know | Refused |
|---------------------------------------------------|-------------------|-------------------|------------------------|------------|---------|
| a. Medicare                                       | <b>49</b>         | <b>6</b>          | <b>43</b>              | <b>2</b>   | --      |
| b. Medicaid                                       | <b>42</b>         | <b>7</b>          | <b>48</b>              | <b>4</b>   | *       |
| c. Biomedical research                            | <b>45</b>         | <b>6</b>          | <b>43</b>              | <b>6</b>   | --      |
| d. Programs to prevent disease and improve health | <b>67</b>         | <b>3</b>          | <b>28</b>              | <b>2</b>   | *       |
| e. Medical care for veterans                      | <b>73</b>         | <b>3</b>          | <b>23</b>              | <b>1</b>   | --      |
| f. Programs to protect against bioterrorism       | <b>35</b>         | <b>15</b>         | <b>45</b>              | <b>4</b>   | *       |

(ROTATE RESPONSE OPTIONS 1-4/4-1)

17. Do you think abortion should be (legal in all cases), (legal in most cases), (illegal in most cases), or (illegal in all cases)?

| <b>Total registered voters</b> | <b>McCain voters</b> | <b>Obama voters</b> |                       |
|--------------------------------|----------------------|---------------------|-----------------------|
| <b>22</b>                      | <b>12</b>            | <b>33</b>           | Legal in all cases    |
| <b>31</b>                      | <b>23</b>            | <b>40</b>           | Legal in most cases   |
| <b>26</b>                      | <b>38</b>            | <b>16</b>           | Illegal in most cases |
| <b>15</b>                      | <b>21</b>            | <b>8</b>            | Illegal in all cases  |
| <b>4</b>                       | <b>4</b>             | <b>2</b>            | Don't know            |
| <b>2</b>                       | <b>1</b>             | <b>1</b>            | Refused               |

18. Are you, yourself, now covered by any form of health insurance or health plan, or do you not have health insurance at this time? A health plan would include any private insurance plan through your employer or a plan that you purchased yourself, as well as a government program like Medicare or (Medicaid/Medi-Cal)?

| <b>Total registered voters</b> | <b>McCain voters</b> | <b>Obama voters</b> |                 |
|--------------------------------|----------------------|---------------------|-----------------|
| <b>90</b>                      | <b>95</b>            | <b>87</b>           | Yes, covered    |
| <b>10</b>                      | <b>5</b>             | <b>13</b>           | No, not covered |
| --                             | --                   | --                  | Don't know      |
| *                              | *                    | *                   | Refused         |

DEMOGRAPHICS

(ROTATE ITEMS IN PARENS)

D02. Generally speaking, do you usually think of yourself as: (a Democrat), (a Republican), an independent or what?

| <b>Total<br/>registered<br/>voters</b> | <b>McCain<br/>voters</b> | <b>Obama<br/>voters</b> |                |
|----------------------------------------|--------------------------|-------------------------|----------------|
| <b>38</b>                              | <b>6</b>                 | <b>69</b>               | Democrat       |
| <b>29</b>                              | <b>60</b>                | <b>5</b>                | Republican     |
| <b>29</b>                              | <b>30</b>                | <b>24</b>               | Independent    |
| <b>1</b>                               | <b>1</b>                 | <b>1</b>                | Something else |
| <b>2</b>                               | <b>2</b>                 | <b>1</b>                | Don't know     |
| <b>1</b>                               | <b>1</b>                 | <b>--</b>               | Refused        |

(ROTATE ITEMS IN PARENS IN SAME ORDER AS Q.D02)

D02a. Do you lean more towards the: (Democratic) or (Republican) Party?

Based on total registered voters who are independent, DK, or refused

| <b>Total<br/>registered<br/>voters</b> | <b>McCain<br/>voters</b> | <b>Obama<br/>voters</b> |            |
|----------------------------------------|--------------------------|-------------------------|------------|
| <b>34</b>                              | <b>7</b>                 | <b>70</b>               | Democrat   |
| <b>37</b>                              | <b>72</b>                | <b>10</b>               | Republican |
| <b>20</b>                              | <b>16</b>                | <b>13</b>               | Neither    |
| <b>7</b>                               | <b>4</b>                 | <b>6</b>                | Don't know |
| <b>3</b>                               | <b>1</b>                 | <b>1</b>                | Refused    |
| <b>N=512</b>                           | <b>N=221</b>             | <b>N=188</b>            |            |

D02/D02a. Combo Table based on total registered voters

| <b>Total<br/>registered<br/>voters</b> | <b>McCain<br/>voters</b> | <b>Obama<br/>voters</b> |                            |
|----------------------------------------|--------------------------|-------------------------|----------------------------|
| <b>48</b>                              | <b>9</b>                 | <b>87</b>               | Democrat/lean Democrat     |
| <b>41</b>                              | <b>84</b>                | <b>7</b>                | Republican/lean Republican |
| <b>7</b>                               | <b>5</b>                 | <b>4</b>                | Independent                |
| <b>1</b>                               | <b>1</b>                 | <b>1</b>                | Something else             |
| <b>2</b>                               | <b>1</b>                 | <b>1</b>                | Don't know                 |
| <b>1</b>                               | <b>1</b>                 | <b>--</b>               | Refused                    |

D03. I'd like you to rate the chances that you will vote in the presidential election in November. Are you absolutely certain to vote, will you probably vote, are the chances 50-50, or less than that?

| <b>Total<br/>registered<br/>voters</b> | <b>McCain<br/>voters</b> | <b>Obama<br/>voters</b> |                    |
|----------------------------------------|--------------------------|-------------------------|--------------------|
| <b>87</b>                              | <b>89</b>                | <b>90</b>               | Absolutely certain |
| <b>7</b>                               | <b>7</b>                 | <b>6</b>                | Probably will      |
| <b>4</b>                               | <b>2</b>                 | <b>3</b>                | Chances are 50-50  |

|   |   |    |                |
|---|---|----|----------------|
| 1 | 1 | *  | Less than that |
| * | * | *  | Don't know     |
| * | * | -- | Refused        |

(ROTATE SCALE 1-3/ 3-1)

D04. Would you say your views on most political matters are...?

| Total registered voters | McCain voters | Obama voters |                                   |
|-------------------------|---------------|--------------|-----------------------------------|
| 22                      | 6             | 38           | Liberal                           |
| 38                      | 30            | 45           | Moderate                          |
| 36                      | 63            | 13           | Conservative                      |
| 1                       | 1             | 1            | (vol.) Don't think in those terms |
| 2                       | 1             | 3            | Don't know                        |
| *                       | *             | --           | Refused                           |

D05. In general, would you say your health is excellent, very good, good, fair, or poor?

| Total registered voters | McCain voters | Obama voters |            |
|-------------------------|---------------|--------------|------------|
| 24                      | 25            | 24           | Excellent  |
| 34                      | 36            | 33           | Very good  |
| 25                      | 24            | 25           | Good       |
| 12                      | 11            | 13           | Fair       |
| 5                       | 3             | 6            | Poor       |
| *                       | --            | --           | Don't know |
| *                       | *             | --           | Refused    |

D06. What is your religious preference? Are you Protestant, Roman Catholic, Jewish, some other religion, or no religion?

| Total registered voters | McCain voters | Obama voters |                     |
|-------------------------|---------------|--------------|---------------------|
| 38                      | 48            | 30           | Protestant          |
| 23                      | 21            | 23           | Roman Catholic      |
| 2                       | 2             | 3            | Jewish              |
| 22                      | 21            | 24           | Some other religion |
| 12                      | 6             | 17           | No religion         |
| *                       | *             | 1            | Don't know          |
| 2                       | 1             | 2            | Refused             |

D06a. Do you consider yourself a Christian or not?

Based on total registered voters whose religious preference is some other religion

| <b>Total<br/>registered<br/>voters</b> | <b>McCain<br/>voters</b> | <b>Obama<br/>voters</b> |            |
|----------------------------------------|--------------------------|-------------------------|------------|
| <b>88</b>                              | <b>92</b>                | <b>84</b>               | Yes        |
| <b>12</b>                              | <b>8</b>                 | <b>15</b>               | No         |
| <b>*</b>                               | <b>--</b>                | <b>*</b>                | Don't know |
| <b>--</b>                              | <b>--</b>                | <b>--</b>               | Refused    |
| <b>N=299</b>                           | <b>N=115</b>             | <b>N=151</b>            |            |

D07. Do you consider yourself a born-again or Evangelical Christian, or not?

Based on total registered voters whose religious preference is Christian

| <b>Total<br/>registered<br/>voters</b> | <b>McCain<br/>voters</b> | <b>Obama<br/>voters</b> |            |
|----------------------------------------|--------------------------|-------------------------|------------|
| <b>43</b>                              | <b>51</b>                | <b>36</b>               | Yes        |
| <b>54</b>                              | <b>45</b>                | <b>63</b>               | No         |
| <b>3</b>                               | <b>3</b>                 | <b>1</b>                | Don't know |
| <b>*</b>                               | <b>*</b>                 | <b>*</b>                | Refused    |
| <b>N=1327</b>                          | <b>N=611</b>             | <b>N=574</b>            |            |

D06/D06a Combo Table based on total registered voters

| <b>Total<br/>registered<br/>voters</b> | <b>McCain<br/>voters</b> | <b>Obama<br/>voters</b> |                                     |
|----------------------------------------|--------------------------|-------------------------|-------------------------------------|
| <b>81</b>                              | <b>89</b>                | <b>74</b>               | Protestant/Catholic/Other Christian |
| <b>38</b>                              | <b>48</b>                | <b>30</b>               | Protestant                          |
| <b>23</b>                              | <b>21</b>                | <b>23</b>               | Catholic                            |
| <b>19</b>                              | <b>19</b>                | <b>20</b>               | Other Christian                     |
| <b>2</b>                               | <b>2</b>                 | <b>3</b>                | Jewish                              |
| <b>3</b>                               | <b>2</b>                 | <b>4</b>                | Some other religion/not Christian   |
| <b>12</b>                              | <b>6</b>                 | <b>17</b>               | No religion                         |
| <b>*</b>                               | <b>*</b>                 | <b>1</b>                | Don't know                          |
| <b>2</b>                               | <b>1</b>                 | <b>2</b>                | Refused                             |

D06/D06a/D07 Combo Table based on total registered voters

| <b>Total registered voters</b> | <b>McCain voters</b> | <b>Obama voters</b> |                                     |
|--------------------------------|----------------------|---------------------|-------------------------------------|
| <b>81</b>                      | <b>89</b>            | <b>74</b>           | Protestant/Catholic/Other Christian |
| <b>35</b>                      | <b>45</b>            | <b>27</b>           | Born-again/evangelical              |
| <b>44</b>                      | <b>40</b>            | <b>46</b>           | Not born-again/evangelical          |
| <b>2</b>                       | <b>2</b>             | <b>3</b>            | Jewish                              |
| <b>3</b>                       | <b>2</b>             | <b>4</b>            | Some other religion/not Christian   |
| <b>12</b>                      | <b>6</b>             | <b>17</b>           | No religion                         |
| <b>*</b>                       | <b>*</b>             | <b>1</b>            | Don't know                          |
| <b>2</b>                       | <b>1</b>             | <b>2</b>            | Refused                             |

D08. What is your age?

| <b>Total registered voters</b> | <b>McCain voters</b> | <b>Obama voters</b> |         |
|--------------------------------|----------------------|---------------------|---------|
| <b>14</b>                      | <b>11</b>            | <b>19</b>           | 18-29   |
| <b>27</b>                      | <b>29</b>            | <b>24</b>           | 30-44   |
| <b>39</b>                      | <b>39</b>            | <b>39</b>           | 45-64   |
| <b>18</b>                      | <b>19</b>            | <b>16</b>           | 65+     |
| <b>2</b>                       | <b>2</b>             | <b>2</b>            | Refused |

D09. What is the last grade of school you completed?

D10. (Ask of those who say they graduated college) Was that an associate's degree, a bachelor's degree, or what?

Education Summary Table based on total registered voters

| <b>Total registered voters</b> | <b>McCain voters</b> | <b>Obama voters</b> |                               |
|--------------------------------|----------------------|---------------------|-------------------------------|
| <b>2</b>                       | <b>1</b>             | <b>3</b>            | 8 <sup>th</sup> grade or less |
| <b>6</b>                       | <b>7</b>             | <b>5</b>            | Some high school              |
| <b>28</b>                      | <b>26</b>            | <b>27</b>           | Graduated high school         |
| <b>36</b>                      | <b>39</b>            | <b>34</b>           | Some college                  |
| <b>15</b>                      | <b>15</b>            | <b>15</b>           | College graduate              |
| <b>13</b>                      | <b>11</b>            | <b>16</b>           | Post graduate training        |
| <b>*</b>                       | <b>--</b>            | <b>*</b>            | Don't know                    |
| <b>*</b>                       | <b>--</b>            | <b>*</b>            | Refused                       |

D11. Are you of Hispanic origin or background?

D12. Are you White Hispanic or Black Hispanic?

D13. Are you white, black, or some other race?

Race Summary Table based on total registered voters

| Total registered voters | McCain voters | Obama voters |                      |
|-------------------------|---------------|--------------|----------------------|
| 74                      | 90            | 58           | White (non-Hispanic) |
| 11                      | 1             | 21           | Black (non-Hispanic) |
| 2                       | *             | 4            | Asian (non-Hispanic) |
| 9                       | 5             | 11           | Hispanic (NET)       |
| 6                       | 4             | 6            | White Hispanic       |
| 1                       | *             | 1            | Black Hispanic       |
| 2                       | 1             | 4            | Hispanic unspecified |
| 3                       | 3             | 4            | Some other race      |
| *                       | *             | *            | Don't know           |
| 1                       | 1             | 1            | Refused              |

D14. Last year, that is in 2007, what was your total family income from all sources, BEFORE taxes?

| Total registered voters | McCain voters | Obama voters |                               |
|-------------------------|---------------|--------------|-------------------------------|
| 30                      | 22            | 35           | Less than \$40K (NET)         |
| 7                       | 5             | 9            | Less than \$15K               |
| 5                       | 4             | 6            | \$15K but less than \$20K     |
| 5                       | 2             | 6            | \$20K but less than \$25K     |
| 4                       | 4             | 5            | \$25K but less than \$30K     |
| 8                       | 7             | 8            | \$30K but less than \$40K     |
| 1                       | 1             | 1            | Less than \$40K (unspecified) |
| 61                      | 70            | 59           | \$40K+ (NET)                  |
| 10                      | 9             | 12           | \$40K but less than \$50K     |
| 9                       | 12            | 7            | \$50K but less than \$60K     |
| 9                       | 11            | 9            | \$60K but less than \$75K     |
| 12                      | 14            | 11           | \$75K but less than \$100K    |
| 17                      | 20            | 17           | \$100K+                       |
| 3                       | 4             | 3            | \$40K+ (unspecified)          |
| 3                       | 2             | 2            | Don't know                    |
| 6                       | 6             | 5            | Refused                       |

D15. LANGUAGE OF INTERVIEW

| Total registered voters | McCain voters | Obama voters |                                  |
|-------------------------|---------------|--------------|----------------------------------|
| 3                       | 2             | 4            | Predominately Spanish (NET)      |
| 3                       | 2             | 3            | All Spanish                      |
| *                       | --            | *            | Mostly Spanish                   |
| --                      | --            | --           | Both Spanish and English equally |
| 97                      | 98            | 96           | Predominately English (NET)      |
| *                       | *             | --           | Mostly English                   |
| 97                      | 98            | 96           | All English                      |

D16. REGION

| <b>Total<br/>registered<br/>voters</b> | <b>McCain<br/>voters</b> | <b>Obama<br/>voters</b> |               |
|----------------------------------------|--------------------------|-------------------------|---------------|
| <b>17</b>                              | <b>16</b>                | <b>19</b>               | Northeast     |
| <b>24</b>                              | <b>22</b>                | <b>24</b>               | North Central |
| <b>35</b>                              | <b>43</b>                | <b>29</b>               | South         |
| <b>23</b>                              | <b>19</b>                | <b>27</b>               | West          |

D17. METRO STATUS

| <b>Total<br/>registered<br/>voters</b> | <b>McCain<br/>voters</b> | <b>Obama<br/>voters</b> |          |
|----------------------------------------|--------------------------|-------------------------|----------|
| <b>31</b>                              | <b>24</b>                | <b>38</b>               | Urban    |
| <b>45</b>                              | <b>47</b>                | <b>43</b>               | Suburban |
| <b>24</b>                              | <b>28</b>                | <b>19</b>               | Rural    |
